# Supplementary material for: Equilibrium, kinetic and solvent effect studies on the reactions of [RuIII(Hedta)(H2O)] with thiols
Source: Royal Society of Chemistry journal article supplement (doi:10.1039/b510553f), 2005-01-01
Supplement: b510553f.pdf [file b510553f.pdf]

## Equilibrium, kinetic and solvent effect studies on the reactions of [Ru<sup>III</sup>(Hedta)H<sub>2</sub>O] with thiols

Mohamed M. Shoukry, Mohamed R. Shehata, Mohamed S. A. Hamza  
and Rudi van Eldik\*

**Table SI-1.** Acid-base data for Ru<sup>III</sup>(edta)(H<sub>2</sub>O)<sup>-</sup> at different concentrations of dioxane at 25 °C and 0.1 M ionic strength.

| Dioxane (%) | M | H <sup>a</sup> | logβ <sup>b</sup> |
|-------------|---|----------------|-------------------|
| 0           | 1 | 1              | 3.12(0.01)        |
|             | 1 | -1             | -7.41(0.02)       |
| 12.5        | 1 | 1              | 3.21(0.02)        |
|             | 1 | -1             | -7.50(0.03)       |
| 25          | 1 | 1              | 3.34(0.02)        |
|             | 1 | -1             | -7.74(0.04)       |
| 37.5        | 1 | 1              | 3.48(0.03)        |
|             | 1 | -1             | -7.97(0.04)       |
| 50          | 1 | 1              | 3.62(0.02)        |
|             | 1 | -1             | -8.15(0.03)       |
| 62.5        | 1 | 1              | 3.72(0.04)        |
|             | 1 | -1             | -8.31(0.05)       |

<sup>a</sup> M and H are the stoichiometric coefficients corresponding to Ru<sup>III</sup>(edta)(H<sub>2</sub>O)<sup>-</sup> and H<sup>+</sup>, respectively. <sup>b</sup> Standard deviations are given in parentheses; sum of square of residuals are less than 5 x 10<sup>-7</sup>.

**Table SI-2.** Complex-formation constants for  $\text{Ru}^{\text{III}}(\text{edta})(\text{H}_2\text{O})^-$  with 2-aminoethanethiol.HCl at different concentrations of dioxane at 25 °C and 0.1 M ionic strength.

| Dioxane (%) | M | L | H <sup>a</sup> | log $\beta^b$ | pK <sub>a</sub> |
|-------------|---|---|----------------|---------------|-----------------|
| 0           | 1 | 1 | 0              | 10.36(0.02)   |                 |
|             | 1 | 1 | 1              | 18.33(0.04)   | 7.97            |
| 12.5        | 1 | 1 | 0              | 10.79(0.03)   |                 |
|             | 1 | 1 | 1              | 18.64 (0.04)  | 7.85            |
| 25          | 1 | 1 | 0              | 11.31 (0.04)  |                 |
|             | 1 | 1 | 1              | 18.97(0.05)   | 7.66            |
| 37.5        | 1 | 1 | 0              | 11.71(0.03)   |                 |
|             | 1 | 1 | 1              | 19.24(0.04)   | 7.53            |
| 50          | 1 | 1 | 0              | 12.27(0.04)   |                 |
|             | 1 | 1 | 1              | 19.53(0.05)   | 7.26            |
| 62.5        | 1 | 1 | 0              | 12.44(0.04)   |                 |
|             | 1 | 1 | 1              | 19.62(0.06)   | 7.18            |

<sup>a</sup> M, L and H are the stoichiometric coefficients corresponding to  $\text{Ru}^{\text{III}}(\text{edta})(\text{H}_2\text{O})^-$ , Ligand and  $\text{H}^+$ , respectively. <sup>b</sup> Standard deviations are given in parentheses; sum of square of residuals are less than  $5 \times 10^{-7}$ .

**Table SI-3.** Acid-base data for mercaptoacetic acid at different concentrations of dioxane at 25 °C and 0.1 M ionic strength.

| Dioxane (%) | L | H <sup>a</sup> | log $\beta$ <sup>b</sup> | pK <sub>a</sub> |
|-------------|---|----------------|--------------------------|-----------------|
| 0           | 1 | 1              | 10.07(0.02)              | 10.07           |
|             | 1 | 2              | 13.58(0.03)              | 3.51            |
| 12.5        | 1 | 1              | 10.49(0.02)              | 10.49           |
|             | 1 | 2              | 14.51(0.02)              | 4.02            |
| 25          | 1 | 1              | 11.10(0.02)              | 10.49           |
|             | 1 | 2              | 15.19(0.04)              | 4.09            |
| 37.5        | 1 | 1              | 11.45(0.03)              | 11.45           |
|             | 1 | 2              | 16.02(0.03)              | 4.57            |
| 50          | 1 | 1              | 11.98(0.03)              | 11.98           |
|             | 1 | 2              | 16.81(0.04)              | 4.83            |
| 62.5        | 1 | 1              | 11.98(0.04)              | 11.98           |
|             | 1 | 2              | 17.59(0.05)              | 5.24            |

<sup>a</sup> L and H are the stoichiometric coefficients corresponding to Ligand and H<sup>+</sup>, respectively. <sup>b</sup> Standard deviations are given in parentheses; sum of square of residuals are less than 5 x 10<sup>-7</sup>.

**Table SI-4.** Complex-formation constants for  $\text{Ru}^{\text{III}}(\text{edta})(\text{H}_2\text{O})^-$  with mercaptoacetic acid for different concentrations of dioxane at 25 °C and 0.1 M ionic strength.

| Dioxane (%) | M | L | H <sup>a</sup> | log $\beta^b$ | pK <sub>a</sub> |
|-------------|---|---|----------------|---------------|-----------------|
| 0           | 1 | 1 | 0              | 9.86(0.03)    |                 |
|             | 1 | 1 | 1              | 13.92(0.04)   | 4.06            |
| 12.5        | 1 | 1 | 0              | 10.32(0.02)   |                 |
|             | 1 | 1 | 1              | 14.25(0.03)   | 3.93            |
| 25          | 1 | 1 | 0              | 10.69(0.04)   |                 |
|             | 1 | 1 | 1              | 14.59(0.05)   | 3.90            |
| 37.5        | 1 | 1 | 0              | 11.14(0.03)   |                 |
|             | 1 | 1 | 1              | 14.89(0.05)   | 3.75            |
| 50          | 1 | 1 | 0              | 11.55(0.02)   |                 |
|             | 1 | 1 | 1              | 15.23(0.04)   | 3.68            |
| 62.5        | 1 | 1 | 0              | 11.73(0.04)   |                 |
|             | 1 | 1 | 1              | 15.19(0.06)   | 3.46            |

<sup>a</sup> M, L and H are the stoichiometric coefficients corresponding to  $\text{Ru}^{\text{III}}(\text{edta})(\text{H}_2\text{O})^-$ , Ligand and  $\text{H}^+$ , respectively. <sup>b</sup> Standard deviations are given in parentheses; sum of square of residuals are less than  $5 \times 10^{-7}$ .

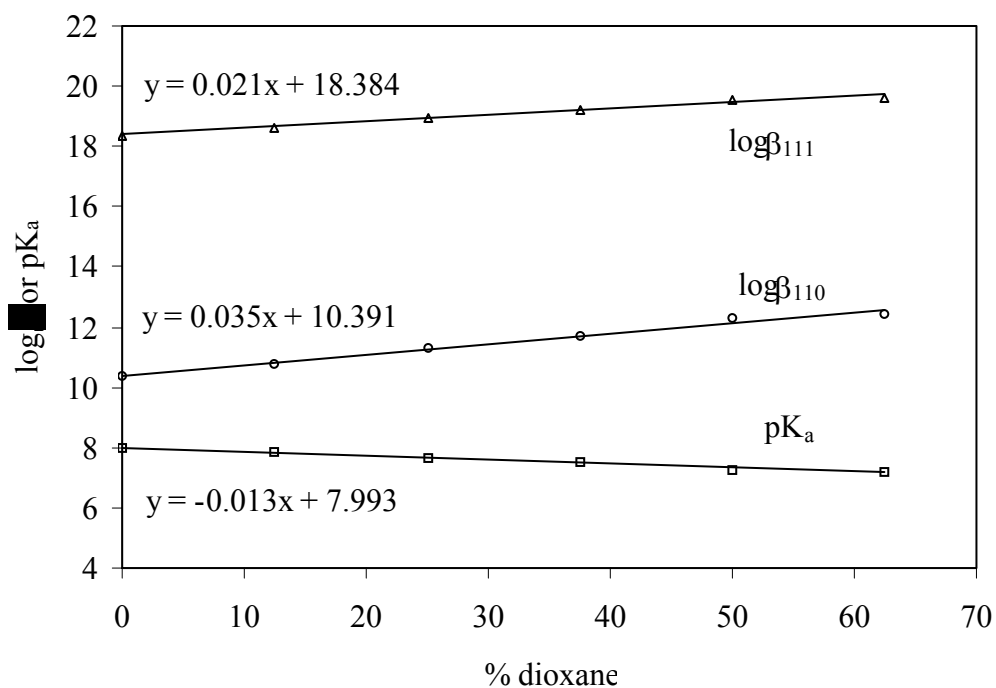

**Figure SI-1.** Complex-formation constants for  $\text{Ru}^{\text{III}}(\text{edta})(\text{H}_2\text{O})^-$  with 2-aminoethanethiol.HCl at different concentrations of dioxane, pK<sub>a</sub> of protonated complex ( $\log\beta_{111}-\log\beta_{110}$ )

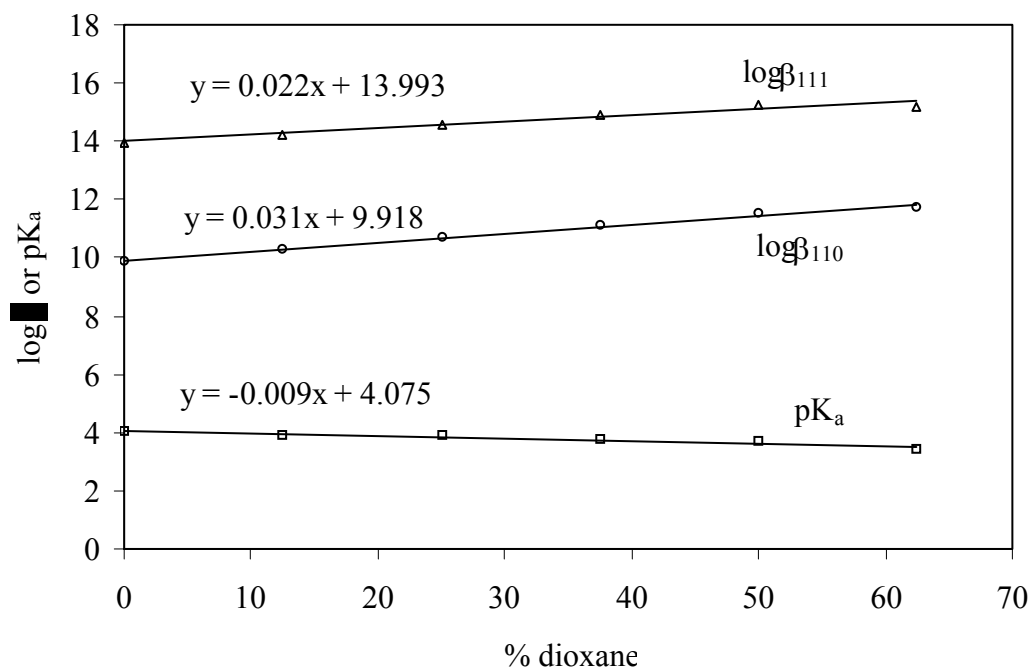

**Figure SI-2.** Complex-formation constants for  $\text{Ru}^{\text{III}}(\text{edta})(\text{H}_2\text{O})^-$  with mercaptoacetic acid at different concentrations of dioxane,  $\text{pK}_a$  of protonated complex ( $\log B_{111} - \log B_{110}$ ).
